# Supplementary material for: CCR5 facilitates endothelial progenitor cell recruitment and promotes the stabilization of atherosclerotic plaques in ApoE−/− mice
Source: PubMed Central journal article supplement (PMC4404610; doi:10.1186/s13287-015-0026-0), 2015-03-19

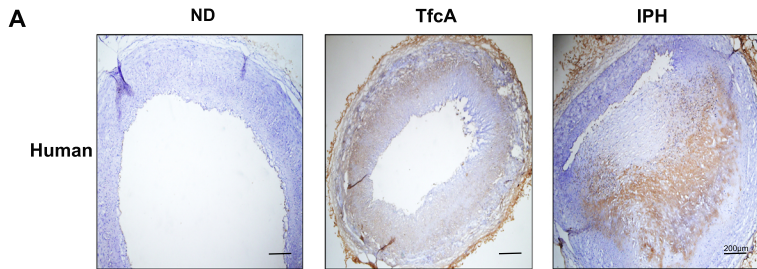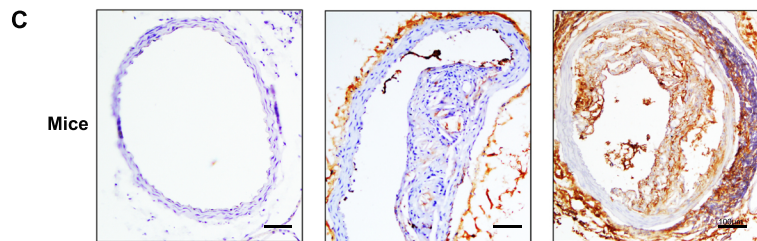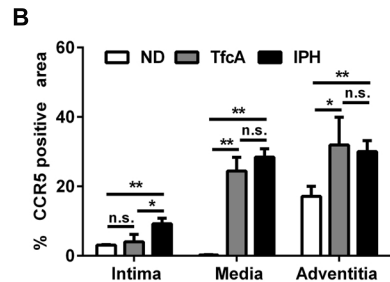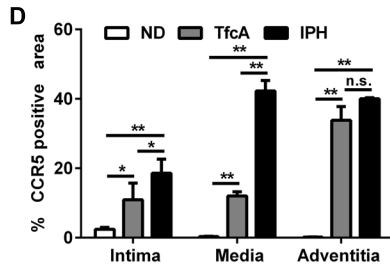

Supplement: 13287_2015_26_MOESM1_ESM.pdf [file 13287_2015_26_MOESM1_ESM.pdf]
